# Supplementary material
Source: Springer Nature journal article supplement (https://www.springermedizin.de/resource/supplementary/12889_2014_7242_MOESM3_ESM.pdf/9497146)

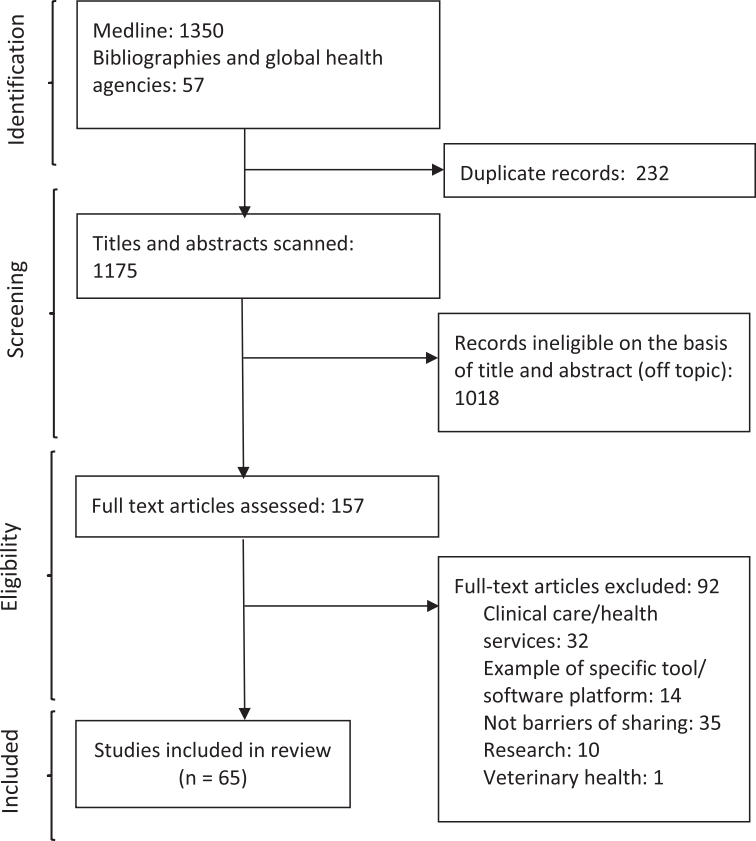

Supplement: MOESM3 [file 9497146]
